# Supplementary material for: The aadE*-sat4-aphA-3 Gene Cluster of Mycoplasma bovirhinis HAZ141_2 Undergoes Genomic Rearrangements Influencing the Primary Promoter Sequence
Source: MDPI journal article supplement (doi:10.3390/antibiotics10111335), 2021-11-01
Supplement: s1 [file s1]

**Figure S1**

**>197 bp Inverted Repeat Left (IRL; nc 870715-870911; MBVR141\_0922)**

ATTTTTCTTTtTACTGCTtGAAACAGTATCTTTGATTGAATGCGTAGTTGTATCTATAACATTTAA  
TTCATAGATTCCtAAATTGGAAAATTGaTTCCACATTGTTTCAACTAATTCAATATTTGTTTCTC  
TGTCTAACTTTGAGCGTTTCGATAGCTCGCTTCATAGTTTCTTCTTTACTTGCCCTTAAAACGATA  
TA

**>197 bp Inverted Repeat Right (IRR; nc 873765-873961; MBOV141\_0926)**

TATATCGTTTTAAGGGCAAGTAAAGAAGAACTATGAAGCGAGCTATCGAACGCTCAAAGTTAGA  
CAGAGAAACAAATATTGAATTAGTTGAAACAATGTGGAAgCAATTTTCCAATTTgGGAATCTATG  
AATTAAATGTTATAGATACAACCTACGCATTCAATCAAAGATACTGTTTCcGCAGTAcAAGAAAAA  
AT

**>155 bp Direct Repeat Left (DRL; nc 871101-871255; MBOV141\_0922)**

ATAATGATAAAAGTCATCTGTGTGCATATGCACAGACTTTTCCAAATCTGATTCTTTTGCAACAG  
CAGATGCCGTTGTAGTTTTTCTGTCCCCGGCGCACCTGTGATTACAATAATTCTACCTTGATTt  
ATCTATATTTTACCTCCaCAAATTC

**>155 bp Direct Repeat Right (DRR; (876931-877085; MBOV141\_0932)**

ATAATGATAAAAGTCATCTGTGTGCATATGCACAGACTTTTCCAAATCTGATTCTTTTGCAACAG  
CAGATGCCGTTGTAGTTTTTCTGTCCCCGGCGCACCTGTGATTACAATAATTCTACCTTGATTc  
ATCTATATTTTACCTCCgCAAATTC

**Figure S1:** Two types of repeated DNA sequences of 155 and 197 base pairs (bps) each, which flank and overlap with the primary promoter P\* located upstream of the *aadE\**. All numbers of nucleotide coordinates are according to the *M. bovirhinis* strain HAZ141\_2 genome (accession number AP018135.1; [1]). Mismatches between two 197 bp IRs and those between two 155 bp DRs are shown as lower-case bolded and underlined letters.

## References

1. Hata, E.; Nagai, K.; Murakami, K. Complete genome sequence of *Mycoplasma bovirhinis* strain HAZ141\_2 from bovine nasal discharge in Japan. *Genome Announc.* **2017**, *5*:e01000-01017.

**Figure S2:** amino acid sequence alignment of *M. bovirhinis* strain HAZ141\_2 putative DNA-directed RNA polymerase alternative sigma factor (MBVR141\_0926) before and after inversion through 197-bp long inverted repeats. The comparison includes three derivative variants of *M. bovirhinis* MBVR141\_0926 protein: (i) 162 aa polypeptide (as found during the genome sequencing of the *M. bovirhinis* strain HAZ141\_2; accession no. BBA22581.1 [1]); (ii) 222 aa polypeptide because of a single-nucleotide polymorphism within the annotated stop codon TAA converting it to TGA encoding tryptophan in mycoplasmas (as found in *M. bovirhinis* strain HAZ141\_2 present in our laboratory) and (iii) 328 aa polypeptide received as a result of the inversion through 197-bp long inverted repeats (Fig. 1A-B). A 106 aa N-terminal extension, appeared in the 328 aa protein is shown in red, while a 60 aa C-terminal extension, appeared in

222 and in 328 aa proteins is shown in blue. In addition, the AAA family ATPase (MULTISPECIES [Bacteria]; RefSeq: WP\_039121379.1) and sigma-70 family RNA polymerase sigma factor (MULTISPECIES [Bacteria]; RefSeq: WP\_197713445.1) were added to the comparison. The AAA-ATPases domain (7-140 aa; pfam13238), identified in the long 328 aa protein is shaded by grey, while the RNA polymerase sigma-70 factor family domain (173-258 aa; TIGR02937), found in all variants of the MBVR141\_0926 protein, is shaded by blue-green. Alignment length is 328 aa residues; the protein sequences were aligned using the CLUSTAL W public server ([https://npsa-prabi.ibcp.fr/cgi-bin/npsa\\_automat.pl?page=/NPSA/npsa\\_clustalwan.html](https://npsa-prabi.ibcp.fr/cgi-bin/npsa_automat.pl?page=/NPSA/npsa_clustalwan.html)) [2]. Identical aa are marked with an asterisk, strongly aa with a colon, while weakly similar aa with a dot. The 1<sup>st</sup> N-terminal residues are underlined as follow: in the short versions the predicted start codon for translation of MBVR141\_0926 is TTG (formally encodes Leu), while in the extended version it is ATA (formally encodes Ile). Both the Leu and Ile are known coding for fMet and used as alternate start codons [3-4].

## References

1. Hata, E.; Nagai, K.; Murakami, K. Complete genome sequence of *Mycoplasma bovirhinis* strain HAZ141\_2 from bovine nasal discharge in Japan. *Genome Announc.* **2017**, *5*, e01000-01017.
2. Thompson, J.D.; Higgins, D.G.; Gibson, T.J. CLUSTAL W: improving the sensitivity of progressive multiple sequence alignment through sequence weighting, position-specific gap penalties and weight matrix choice. *Nucleic Acids Res.* **1994**, *22*, 4673-4680.
3. Hecht, A.; Glasgow, J.; Jaschke, P. R.; Bawazer, L. A.; Munson, M. S.; Cochran, J. R.; Endy, D.; Salit, M. Measurements of translation initiation from all 64 codons in *E. coli*. *Nucleic Acids Res.* **2017**, *45*, 3615-3626.
4. Chang, C.-P.; Chen, S.-J.; Lin, C.-H.; Wang, T.-L.; Wang, C.-C. A single sequence context cannot satisfy all non-AUG initiator codons in yeast. *BMC Microbiol.* **2010**, *10*, 188-196.
