# Supplementary material for: The aadE*-sat4-aphA-3 Gene Cluster of Mycoplasma bovirhinis HAZ141_2 Undergoes Genomic Rearrangements Influencing the Primary Promoter Sequence
Source: MDPI journal article supplement (doi:10.3390/antibiotics10111335), 2021-11-01
Supplement: s1 [file s1]

|                                       | -35                     | ext.-10                                       | +1                            | RBS                      | fMet       |                |
|---------------------------------------|-------------------------|-----------------------------------------------|-------------------------------|--------------------------|------------|----------------|
| M. bovirh. HAZ141_2_P*                | TTGAAA-AAATGTAAAATTTGT  | <b>TGATATAAT</b> -AAACTG                      | <u>A</u> ACGATAAAATAAGAATTTGC | <b>GGAGGT</b> AAAAATATAG | <b>ATG</b> | <i>aadE*</i> → |
| M. bovirh. HAZ141_2_P* <sup>Der</sup> | ATGATACAGTGAATAGATTTTAT | <b>TGATATAAT</b> -GAG-TTATCAACAAATCGGAATTTGT  | <b>GGAGGT</b> AAAAATATAG      | <b>ATA</b>               |            | <i>aadE*</i> → |
|                                       | *****                   | ***                                           | *****                         | *****                    |            |                |
| C. coli pCFSAN032805                  | ATGATACAGTGAATAGATTTTAT | <b>TGATATAAT</b> -GAG-TTATCAACAAATCGGAATTTGT  | <b>GGAGGT</b> AAAAATATAG      | <b>ATA</b>               |            | <i>aadE*</i> → |
| C. coli pCFSAN032806                  | ATGATACAGTGAATAGATTTTAT | <b>TGATATAAT</b> -GAG-TTATCAACAAATCGGAATTTGT  | <b>GGAGGT</b> AAAAATATAG      | <b>ATA</b>               |            | <i>aadE*</i> → |
| C. coli pCCDM183                      | ATGATACAGTGAATAGATTTTAT | <b>TGATATAAT</b> -GAG-TTATCAACAAATCGGAATTTGT  | <b>GGAGGT</b> AAAAATATAG      | <b>ATA</b>               |            | <i>aadE*</i> → |
| C. jejuni pGMI16-002                  | ATGATACAGTGAATAGATTTTAT | <b>TGATATAAT</b> -GAG-TTATCAACAAATCGGAATTTGT  | <b>GGAGGT</b> AAAAATATAG      | <b>ATA</b>               |            | <i>aadE*</i> → |
| C. jejuni pCG8245                     | TTGAAA-AGTGGATAGATTTTAT | <b>TGATACAGT</b> -GAATAGA..+29 bp..GGAATTTGT  | <b>GGAGGT</b> AAAAATATAG      | <b>ATA</b>               |            | <i>aadE*</i> → |
| C. jejuni pGB19                       | GTGTTT-CTTATGCTGTTGTAT  | <b>TGGTATgAT</b> -TAGTAAG..+20 bp..AGAATTTGT  | <b>GGAGGT</b> AAAAATATAG      | <b>ATG</b>               |            | <i>aadE*</i> → |
| E. faecalis plasmid                   | TTGTATCGGCAAAAAAGAAGAT  | <b>TGTAATAAT</b> -ATAGAAA.....AAATAAAC-       | <b>GAGG</b> -AGTATGTAA        | <b>ATG</b>               |            | <i>aadE</i> →  |
| S. aureus Tn5405                      | TTGTATCGGCAAAAAAGAAGAT  | <b>TGTAATAAT</b> -ATAGAAA.....AAATAAAC-       | <b>GAGG</b> -AGTATGTAA        | <b>ATG</b>               |            | <i>aadE</i> →  |
| S. epidermidis plasmid                | TTGTATCGGCAAAAAAGAAGAT  | <b>TGTAATAAT</b> -ATAGAAA.....AAATAAAC-       | <b>GAGG</b> -AGTATGTAA        | <b>ATG</b>               |            | <i>aadE</i> →  |
| S. pyogenes NGAS322                   | TTTTAA-AATAGTAGACTATGT  | <b>TGATATAAT</b> -AGAATCG.....GAAGTTGT        | <b>GGAGGT</b> AAAAATATAG      | <b>ATG</b>               |            | <i>aadE*</i> → |
| S. suis PP phi-SsUD.1                 | TTAAAAAATCGTTTATGTT     | <b>TGTTCAAAT</b> TATCCTGAA..+35 bp..AAAATAAAC | <b>GAGG</b> -AGTATGTAA        | <b>ATG</b>               |            | <i>aadE</i> →  |

**Figure S3:** the closest homologous sequences of the putative promoters located upstream of *aadE\**- and *aadE*-like genes in genomes of other bacteria. Nucleotide sequence alignment of *Mycoplasma bovirhinis* HAZ141\_2 P\* and P\*<sup>Der</sup> promoters with their closest homologous identified in genomes of other bacteria. The sequences were aligned using the CLUSTALW [1] public server ([https://npsa-prabi.ibcp.fr/cgi-bin/npsa\\_automat.pl?page=NPSA/npsa\\_clustalwan.html](https://npsa-prabi.ibcp.fr/cgi-bin/npsa_automat.pl?page=NPSA/npsa_clustalwan.html)). Promoter elements, as previously identified for P\* [2] are shown with -35 and extended -10 (as ext. -10) above the boldface letters. The 5'RACE experimentally validated transcription start site is shown with +1 above, boldfaced and underlined. Predicted ribosome-binding site is shown with RBS above the boldface italicized letters. Arrow indicates the position and direction of transcription of the *aadE\** gene, putative start codons of which (ATG before and ATA after inversion) are shown in bold and underlined. The identical nucleotides identified between *M. bovirhinis* HAZ141\_2 P\*<sup>Der</sup> promoter and its homologous sequences in genomes of other bacteria are marked with asterisks.

C. coli pCFSAN032805 - *Campylobacter coli* strain CFSAN032805, plasmid pCFSAN032805 (CP045793.1).

C. coli pCFSAN032806 - *Campylobacter coli* strain CFSAN032806, plasmid pCFSAN032806 (either CP045790.1, or CP023544.1).  
C. coli pCCDM183 - *Campylobacter coli* strain BP3183 plasmid pCCDM183 (CP017872.1).  
C. jejuni pGMI16-002 - *Campylobacter jejuni* strain CFSAN054107 plasmid pGMI16-002 (CP028186.1).  
C. jejuni pCG8245 - *Campylobacter jejuni* strain CG8245, plasmid pCG8245 (AY701528.1).  
C. jejuni pGB19 - *Campylobacter jejuni* strain GB19, plasmid pGB19 (CP071593.1).  
E. faecalis plasmid - *Enterococcus faecalis* strain OG1RF x UW3114 T-12, plasmid pLG2 (HQ426665.1).  
S. aureus Tn5405 – *Staphylococcus aureus* strain, transposon Tn5405 (U73026).  
S. epidermidis plasmid - *Staphylococcus epidermidis* strain RP62A, plasmid pSERP (CP000028.1).  
S. pyogenes NGAS322 – *Streptococcus pyogenes* strain NGAS322 (CP010449.1).  
S. suis PP phi-SsUD.1 - *Streptococcus suis* strain SsUD, prophage phi-SsUD.1 (FN997652.1).

## References:

1. Thompson, J.D.; Higgins, D.G.; Gibson, T.J. CLUSTAL W: improving the sensitivity of progressive multiple sequence alignment through sequence weighting, position-specific gap penalties and weight matrix choice. *Nucleic Acids Res.* **1994**, *22*, 4673–4680.
2. Lysnyansky, I; Borovok, I. A GC-rich prophage-like genomic region of *Mycoplasma bovirhinis* HAZ141\_2 carries a gene cluster encoding resistance to kanamycin and neomycin. *Antimicrob Agents Chemother.* **2021**, *65*:e01010-20. doi: 10.1128/AAC.01010-20.

**SphI** pACYC184-R1-SphI →

1 **GCATGCGTAT TAACGAAGCG CTAACC**GTTT TTATCAGGCT CTGGGAGGCA GAATAAATGA TCATATCGTC AATTATTACC TCCACGGGGA  
 91 GAGCCTGAGC AAACCTGGCCT CAGGCATTTG AGAAGCACAC GGTACACTG CTTCCGGTAG TCAATAAACC GGTAAACCAG CAATAGACAT  
 181 AAGCGGCTAT TTAACGACCC TGCCCTGAAC CGACGACCGG GTCGAATTTG CTTTCGAATT TCTGCCATTC ATCCGCTTAT TATCACTTAT

**+A283**

271 TCAGGCGTAG **CAACC**AGGCG TTTAAGGGCA CCAATAACTG CCTTAAAAA **ATTAC**GCCCC GCCCTGCCAC TCATCGCAGT ACTGTTGTAA  
 220 <<.....**cat**.....<  
 \* A G G Q W E D C Y Q Q L

**397**

361 TTCATTAAGC ATTCTGCCGA CATGGAAGCC ATCACAA**ACG** GCATGATGAA CCTGAATCGC CAGCGGCATC AGCACCTTGT CGCCTTGCCT  
 <.....**cat**.....<  
 207 E N L M R G V H F G D C V A H H V Q I A L P M L V K D G Q T

451 ATAATATTTG CCCATGGTGA AAACGGGGGC GAAGAAGTTG TCCATATTGG CCACGTTTAA ATCAAAACTG GTGAAACTCA CCCAGGGATT  
 <.....**cat**.....<  
 177 Y Y K G M T F V P A F F N D M N A V N L D F S T F S V W P N

541 GGCTGAGACG AAAAACATAT TCTCAATAAA CCCTTTAGGG AAATAGGCCA GGTTTTACCC GTAACACGCC ACATCTTGCG AATATATGTG  
 <.....**cat**.....<  
 147 A S V F F M N E I F G K P F Y A L N E G Y C A V D Q S Y I H

631 TAGAAACTGC CGGAAATCGT CGTGGTATTC ACTCCAGAGC GATGAAAACG TTTCAGTTTG CTCATGGAAA ACGGTGTAAC AAGGGTGAAC  
 <.....**cat**.....<  
 117 L F Q R F D D H Y E S W L S S F T E T Q E H F V T Y C P H V

**1680**

721 ACTATCCCAT ATCACCAGCT CACCGTCTTT CATTGCCATA CG**A**AATCCG GATGAGCATT CATCAGGCGG GCAAGAATGT GAATAAAGGC  
 <.....**cat**.....<  
 87 S D W I V L E G D K M A M R F E P H A N M L R A L I H I F A

811 CGGATAAAAC TTGTGCTTAT TTTTCTTTAC GGTCTTTAAA AAGGCCGTAA TATCCAGCTG AACGGTCTGG TTATAGGTAC ATTGAGCAAC  
 <.....**cat**.....<

```

57   P Y F K H K N K K V T K L F A T I D L Q V T Q N Y T C Q A V

901  T G A C T G A A A T G C C T C A A A T G T T C T T T A C G A T G C C A T T G G A T A T A T C A A C G G T G G T A T A T C C A G T G A T T T T T T C T C CA T T T T A G CTTC
    <.....cat.....<<
27   S Q F A E F H E K R H W Q S I D V T T Y G T I K K E M

                                +1?      ← -10/P5                                ← -35/P5
991  CTT A G C T C C T G A A A T C T C G A T A A C T C A A A A A T A C G C C C G G T A G T A T C T T A T T T C A T T A T G G T G A A A G T T G G A A C C T C T T A C G T G C C G

1081 A T C A A C G T C T C A T T T T C G C C A A A G T T G G C C C A G G G C T T C C C G G T A T C A A C A G G G A C A C C A G G A T T T A T T T A T T C T G C G A A G T G A T C T T C

                                ← IS1_del_Rev      IS1_del_For →
1171 C G T C A C A G G T A T T T A T T C G G C G C A A G T G C G T C G G C G G A G T G T A T A C T G G C T T A C T A T G T T G G C A C T G A T G A G G G T G T C A G T G A A G T G C T

1261 T C A T G T G G C A G G A G A A A A A A G G C T G C A C C G G T G C G T C A G C A G A A T A T G T G A T A C A G G A T A T A T C C G C T T C C T C G C T C A C T G A C T C G C T A

1351 C G C T C G G T C G T T C G A C T G C G G C G A G C G G A A A T G G C T T A C G A A C G G G G C G G A G A T T T C C T G G A A G A T G C C A G G A A G A T A C T T A A C A G G G A A

1441 G T G A G A G G G C C G C G G C A A A G C C G T T TTTCC ATAGGCTCCG CCCCCCTGAC AAGCATCACG AAATCTGACG CTCAAATCAG TGGTGGCGAA
1531 ACCCGACAGG ACTATAAAGA TACCAGGCGT TTCCCCCTGG CGGCTCCCTC GTGCGCTCTC CTGTTCCCTGC CTTTCGGTTT ACCGGTGTCA
1621 TTCCGCTGTT ATGGCCGCGT TTGTCTCATT CCACGCCTGA CACTCAGTTC CGGGTAGGCA GTTTCGCTCCA AGCTGGACTG TATGCACGAA
1711 CCCCCGTTC AGTCCGACCG CTGCGCCTTA TCCGGTAACT ATCGTCTTGA GTCCAACCCG GAAAGACATG CAAAAGCACC ACTGGCAGCA
1801 GCCACTGGTA ATTGATTTAG AGGAGTTAGT CTTGAAGTCA TGCGCCGGTT AAGGCTAAAC TGAAAGGACA AGTTTTGGTG ACTGCGCTCC
1891 TCCAAGCCAG TTACCTCGGT TCAAAGAGTT GGTAGCTCAG AGAACCTTCG AAAAACCGCC CTGCAAGGCG GTTTTTTCGT TTTCAGAGCA
1981 AGAGATTACG CGCAGACCAA AACGATCTCA AGAAGATCAT CTTATTAATC AGATAAAATA TTTCTAGATT TCAGTGCAAT TTATCTCTTC

                                ← NEW_HindIII_pACYC184 HindIII
2071 A A A T G T A G C A C C T G A A G T C A G C C C C A T A C G A T A T A A G T T G T A A T T C T C A T G T A A G C T T

```

**Figure S4:** sequence of the pACYC\_ΔtetΔP2<sup>vec</sup>ΔP4<sup>vec</sup> cloning vector used in this study. The 2,128 bp pACYC\_ΔtetΔP2<sup>vec</sup>ΔP4<sup>vec</sup> cloning vector was constructed from the low-copy-number pACYC184 plasmid (4,245 bp; GenBank X06403.1) by deletion of its P2 and P4 promoters (described

by Stuber & Bujard [1] and designated here as P2<sup>vec</sup> and P4<sup>vec</sup>) as well as the *tet* gene as described in Materials and Methods and in Tables S1-2. Names of primers (pACYC184-R1-SphI, IS1\_del\_For, IS1\_del\_Rev, and NEW\_HindIII\_pACYC184) used for assembling PCR shown above the corresponding sequences in bold blue; overlapping sequences of IS1\_del\_For and IS1\_del\_Rev are underlined. Both start and stop codons of the *cat* gene (a minus strand) encoding resistance to chloramphenicol shown in bold red and underlined. The *cat*-P5 promoter-related elements including +1 (transcription start site), -10, and -35 elements are bolded and underlined; the predicted ribosome-binding site (RBS) is shown in bold italic. The p15A origin of replication is grey highlighted. One single nucleotide polymorphism (SNP of G to A; a silent mutation) has been identified at position 397 of the pACYC\_ΔtetΔP2<sup>vec</sup>ΔP4<sup>vec</sup> within the encoding sequence of the *cat* gene results in silent mutation. In addition, an indel (as insertion) of a nucleotide "A" (+A283) was found at position 283 of the pACYC\_ΔtetΔP2<sup>vec</sup>ΔP4<sup>vec</sup> located downstream of the *cat* gene. The newly designed restriction sites *HindIII* and *SphI*, used for the cloning in this study, are italicized, bolded and underlined. The nucleotide 1680 (in bold and green highlighted) corresponds to the 1<sup>st</sup> nucleotide of pACYC184 (X06403.1).

## References

1. Stuber, D.; Bujard, H. Organization of transcriptional signals in plasmids pBR322 and pACYC184. *Proc Natl Acad Sci U S A* **1981**, *78*, 167-71.

**Figure S5:** schematics (as circular maps) of the seven plasmid constructs used in this study and nucleotide sequences of the *aadE*\*-*sat4*-*aphA*-3 derivatives used for cloning into unique *Hind*III and *Sph*I restriction sites of the pACYC\_ΔtetΔP2<sup>vec</sup>ΔP4<sup>vec</sup> vector (Fig. S4).

All of schematics contain the following common elements: genes shown as bended arrows colored with yellow for *cat* (resistance to chloramphenicol), red for *aadE*\*, blue for *sat4*, and green for *aphA*-3; promoters shown as colored rectangles, whose colors correspond to their cognate genes (e.g. P5 of *cat* is yellow, P2 of *aphA*-3 is green etc). The plasmid p15A origin of replication shown as a grey bended rectangle and signed as *ori* p15A. Black rectangles mark positions of predicted transcriptional terminators signed with T capital. Each of schematics is followed with a nucleotide sequence of the corresponding cloned insert. Open reading frames (ORFs) of *aadE*\*, *sat4* and *aphA*-3 are shown in bold and colored as described above – red for *aadE*\*, blue for *sat4*, and green for *aphA*-3 except a four-nucleotide overlapping between the stop codon of *aadE*\* (TGA) and the start of *sat4* (GTG), which colorless and underlined. An ORF remnant (if there is) shown with same color as that of an intact ORF. Start and stop codons of ORFs underlined. Promoter sequences shown in bold and highlighted using the following colors – grey for P\* and P\*<sup>Der</sup>, yellow for P1'', and green for P2.

#### pACYC\_P\* (4,343 bp)

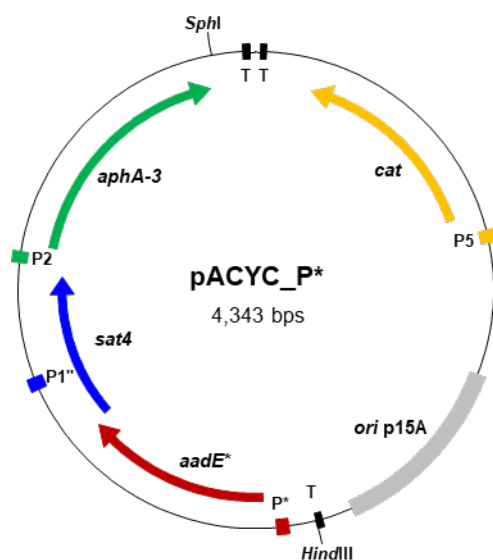

pACYC\_P\* (an insert size is 2,215 bp; without flanking *HindIII* and *SphI* sites)

*HindIII*

**AAGCTT**GCACATTCGGTAACGGAAGCAGTTACAATCTCCTGCAAAGTCGGGAGATTTTTTCGTTATACGGTAGGTGAATG  
 TAT**TTGAAAAAATGTAAAAATTTGTGATATAAT**AAACTGAACGATAAATAAGAATTTGCGGAGGTAAAATATAG**ATGAATCA**  
**AGGTAGAATTATTGTAATCACAGGTGCGCCGGGGACAGGAAAACTACAACGGCATCTGCTGTTGCAAAAGAATCAGATT**  
**TGGAAAAGTCTGTGCATATGCACACAGATGACTTTTATCATTATCATGTAAGAAAGCCAAGCGCAAGGGAGTATGATGAT**  
**TGCTGCAATGAATTTTGAATGTAACAGCTTATGTTATTAAAGGATTGTGCCGTAAGGAAATTTTATTTGCTATTGATCA**  
**TTTTAATCAGATTGTTTCGCCATGAGCTGCTGAGAATGATATCATGGAAGGTCGGCATCGAAACAGGCTTTAAATTAAGTG**  
**TAGGCAAGAACTATAAGTTTATTGAAAGGTATGTATCCGAGGATTTGTGGGAGAACTTTTGTCCACCTACCGGATGGAT**  
**TCCTATGAAAACATATGGGAAGCATTATTTCTATGCCATCAATTGTTTCAGGGCGGTATCCGGTGAGGTGGCGGAATGGCT**  
**TCATTATGCCTATCCGGAGTATGATAGGAATATAACAAAATATACCAGGGACATGTATAAAAAATACACTGGTAAAACCG**  
**GCTGCCTGGATAGCACATATGCCGCTGATATAGAAGAGAGGCGGGAACA****GTGA****TTACAGAAATGAAAGCAGGGCACCTGA**  
**AAGATATCGATAAACCAGCGAACCATTTGAGGTGATAGGTAAGATTATACCGAGGTATGAAAACGAGAATTGGACCTTT**  
**ACAGAATTACTCTATGAAGCGCCATATTTAAAAAGCTACCAAGACGAAGAGGATGAAGAGGATGAGGAGGCAGATTGCCT**  
**TGAATATA****TTGACAATACTGATAAGATAATATATCTTT**TACTACCAAGACGATAAATGCGTCGGAAAAGTTAAACTGCGAA  
 AAAATTGGAACCGGTACGCTTATATAGAAGATATCGCCGTATGTAAGGATTTTCAGGGGGCAAGGCATAGGCAGCGCGCTT  
 ATCAATATATCTATAGAATGGGCAAAGCATAAAAACTTGCATGGACTAATGCTTGAAACCCAGGACAATAACCTTATAGC  
 TTGTAAATCTATCATAATTGTGGTTTCAAATCGGCTCCGTCGATACTATGTTATACGCCAACTTTGAAAACAACCTTG  
**AAAAAGCTGTTTTCTGGTATTTAAGGTTTTAG**AATGCAAGGAACAGTGAATTGGAGTTCGTC**TTGTTATAATTAGCTTCT**  
**TGGGGTATCTT**TAAATACTGTAGAAAAGAGGAAGGAATAATAA**ATGGCTAAATGAGAATATCACCGGAATTGAAAAAA**  
**CTGATCGAAAAATACCGCTGCGTAAAAGATACGGAAGGAATGTCTCCTGCTAAGGTATATAAGCTGGTGGGAGAAAATGA**  
**AAACCTATATTTAAAAATGACGGACAGCCGGTATAAAGGGACCACCTATGATGTGGAACGGGAAAAGGACATGATGCTAT**  
**GGCTGGAAGGAAAGCTGCCTGTTCCAAAGGTCCTGCACTTTGAACGGCATGATGGCTGGAGCAATCTGCTCATGAGTGAG**  
**GCCGATGGCGTCCTTTGCTCGGAAGAGTATGAAGATGAACAAAGCCCTGAAAAGATTATCGAGCTGTATGCGGAGTGCAT**  
**CAGGCTCTTTCACTCCATCGACATATCGGATTGTCCCTATACGAATAGCTTAGACAGCCGCTTAGCCGAATTGGATTACT**  
**TACTGAATAACGATCTGGCCGATGTGGATTGCGAAAACCTGGGAAGAAGACACTCCATTTAAAGATCCGCGCGAGCTGTAT**  
**GATTTTTTTAAAGACGGAAAAGCCCAGAGGAACTTGTCTTTTCCACGGCGACCTGGGAGACAGCAACATCTTTGTGAA**  
**AGATGGCAAAGTAAGTGGCTTTATTGATCTTGGGAGAAGCGGCAGGGCGGACAAGTGGTATGACATTGCCTTCTGCGTCC**

GGTCGATCAGGGAGGATATCGGGGAAGAACAGTATGTCGAGCTATTTTTTGA<sup>CTTACTGGGGATCAAGCCTGATTGGGAG</sup>  
 AAAATAAAATATTATATTTTACTGGATGAATTGTTTTAGTACCTAGATTTAGATATCTAAAGCATGC  
*SphI*

### pACYC\_P\*Der (4,294 bp)

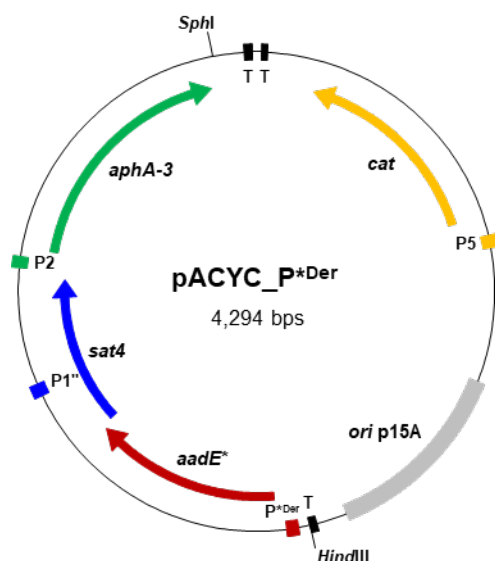

### pACYC\_P\*Der (an insert size is 2,166 bp; a putative alternative promoter is underlined)

*HindIII*

AAGCTTGGACAAGATTGAAAAGTGGATAGATTTATGATACAGTGAATAGATTTATGATATAATGAGTTATCAACAAATCG  
 GAATTTGTGGAGGTAAAATATAGATAAATCAAGGTAGAATTATTGTAATCACAGGTGCGCCGGGGACAGGAAAACTACA  
 ACGGCATCTGCTGTTGCAAAAGAATCAGATTTGGAAAAGTCTGTGCATATGCACACAGATGACTTTTATCATTATCATGT  
 AAGAAAGCCAAGCGCAAGGGAGTATGATGATTGCTGCAATGAATTTTGGAAATGTAAACAGCTTATGTTATTAAAGGATTGT  
 GCCGTAAGGAAATTTTATTTGCTATTGATCATTTTAATCAGATTGTTTCGCCATGAGCTGCTGAGAATGATATCATGGAAG



GTCGGCATCGAAACAGGCTTTAAATTAAGTGTAGGCAAGAACTATAAGTTTATTGAAAGGTATGTATCCGAGGATTTGTG  
 GGAGAACTTTTTGTCCACCTACCGGATGGATTCCCTATGAAAACATATGGGAAGCATTATTTCTATGCCATCAATTGTTCA  
 GGGCGGTATCCGGTGAGGTGGCGGAATGGCTTCATTATGCCTATCCGGAGTATGATAGGAATATAACAAAATATACCAGG  
 GACATGTATAAAAAATACACTGGTAAAACCGGCTGCCTGGATAGCACATATGCCGCTGATATAGAAGAGAGGCGGGAACA  
GTGAATTACAGAAATGAAAGCAGGGCACCTGAAAGATATCGATAAACCCAGCGAACCATTGAGGTGATAGGTAAGATTAT  
 ACCGAGGTATGAAAACGAGAATTGGACCTTTACAGAATTACTCTATGAAGCGCCATATTTAAAAAGCTACCAAGACGAAG  
 AGGATGAAGAGGATGAGGAGGCAGATTGCCTTGAATATATTGACAATACTGATAAGATAATATATCTTTACTACCAAGAC  
 GATAAATGCGTCGGAAAAGTTAACTGCGAAAAAATTGGAACCGGTACGCTTATATAGAAGATATCGCCGTATGTAAGGA  
 TTTCAGGGGGCAAGGCATAGGCAGCGCGCTTATCAATATATCTATAGAATGGGCAAAGCATAAAAACTTGCATGGACTAA  
 TGCTTGAAACCCAGGACAATAACCTTATAGCTTGTAATTCCTATCATAATTGTGGTTTCAAATCGGCTCCGTCGATACT  
 ATGTTATACGCCAATTTGAAAACAACCTTGAAAAAGCTGTTTTCTGGTATTTAAGGTTTTAGAATGCAAGGAACAGTGA  
 ATTGGAGTTCGTCTTGTTATAATTAGCTTCTTGGGGTATCTTTAAATACTGTAGAAAAGAGGAAGGAAATAATAAATGGC  
 TAAAATGAGAATATCACCGGAATTGAAAAAATGATCGAAAAATACCGCTGCGTAAAAGATACGGAAGGAATGTCTCCTG  
 CTAAGGTATATAAGCTGGTGGGAGAAAATGAAAACCTATATTTAAAAATGACGGACAGCCGGTATAAAGGGACCACCTAT  
 GATGTGGAACGGGAAAAGGACATGATGCTATGGCTGGAAGGAAAGCTGCCTGTTCCAAAGGTCTGCACTTTGAACGGCA  
 TGATGGCTGGAGCAATCTGCTCATGAGTGAGGCCGATGGCGTCCTTTGCTCGGAAGAGTATGAAGATGAACAAAGCCCTG  
 AAAAGATTATCGAGCTGTATGCGGAGTGCATCAGGCTCTTTCACTCCATCGACATATCGGATTGTCCCTATACGAATAGC  
 TTAGACAGCCGCTTAGCCGAATTGGATTACTTACTGAATAACGATCTGGCCGATGTGGATTGCGAAAACGGGAAGAAGA  
 CACTCCATTTAAAGATCCGCGCGAGCTGTATGATTTTTTAAAGACGGAAAAGCCGAAGAGGAACTTGTCTTTTCCCACG  
 GCGACCTGGGAGACAGCAACATCTTTGTGAAAGATGGCAAAGTAAGTGGCTTTATTGATCTTGGGAGAAGCGGCAGGGCG  
 GACAAGTGGTATGACATTGCCTTCTGCGTCCGGTCGATCAGGGAGGATATCGGGGAAGAACAGTATGTCGAGCTATTTTT  
 TGACTTACTGGGGATCAAGCCTGATTGGGAGAAAATAAAATATTATTTTACTGGATGAATTGTTTTAGTACCTAGATT  
 TAGATATCTAAAGCATGC

*SphI*

### pACYC\_P\*\_ $\Delta$ aadE\* (3,791 bp)

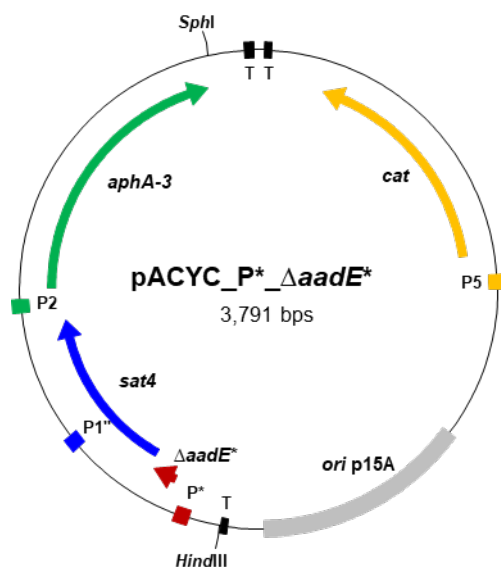

### pACYC\_P\*\_ $\Delta$ aadE\* (an insert size is 1,663 bp)

*Hind*III

**AAGCTT**GCACATTCGGTAACGGAAGCAGTTACAATCTCCTGCAAAGTCGGGAGATTTTTTCGTTATACGGTAGGTGAATG  
 TAT**TTGAAAAAATGTAAAATTTGTGATATAAT**AAACTGAACGATAAATAAGAATTTGCGGAGGTAAAATATAG**ATGAATCA**  
**AGGTAGAATTATTGTAATCACAGGTGCGCCGGGGACAATAGAAGAGAGGCGGGAACA****GTGATTACAGAAATGAAAGCAGG**  
**GCACCTGAAAGATATCGATAAACCCAGCGAACCATTTGAGGTGATAGGTAAGATTATACCGAGGTATGAAAACGAGAATT**  
**GGACCTTTACAGAATTACTCTATGAAGCGCCATATTTAAAAAGCTACCAAGACGAAGAGGATGAAGAGGATGAGGAGGCA**  
**GATTGCCTTGAATATATTGACAATACTGATAAGATAATATATCTTT**ACTACCAAGACGATAAATGCGTCGGAAAAGTTAA  
**ACTGCGAAAAAATTGGAACCGGTACGCTTATATAGAAGATATCGCCGTATGTAAGGATTT**CAGGGGGCAAGGCATAGGCA  
**GCGCGCTTATCAATATATCTATAGAATGGGCAAAGCATAAAAACTTGCATGGACTAATGCTTGAAACCCAGGACAATAAC**

CTTATAGCTTGTAATTCTATCATAATTGTGGTTTCAAAATCGGCTCCGTCGATACTATGTTATACGCCAACTTTGAAAA  
 CAACCTTTGAAAAAGCTGTTTTCTGGTATTTAAGGTTTTAGAAATGCAAGGAACAGTGAATTGGAGTTTCGTC TTGTTATAAT  
 TAGCTTCTTGGGGTATCTT TAAATACTGTAGAAAAGAGGAAGGAAATAATAA ATGGCTAAAATGAGAATATCACCGGAAT  
 TGAAAAAACTGATCGAAAAATACCGCTGCGTAAAAGATACGGAAGGAATGTCTCCTGCTAAGGTATATAAGCTGGTGGGA  
 GAAAATGAAAACCTATATTTAAAAATGACGGACAGCCGGTATAAAGGGACCACCTATGATGTGGAACGGGAAAAGGACAT  
 GATGCTATGGCTGGAAGGAAAGCTGCCTGTTCCAAAGGTCCTGCACCTTTGAACGGCATGATGGCTGGAGCAATCTGCTCA  
 TGAGTGAGGCCGATGGCGTCCTTTGCTCGGAAGAGTATGAAGATGAACAAAGCCCTGAAAAGATTATCGAGCTGTATGCG  
 GAGTGCATCAGGCTCTTTCACCTCCATCGACATATCGGATTGTCCCTATACGAATAGCTTAGACAGCCGCTTAGCCGAATT  
 GGATTACTTACTGAATAACGATCTGGCCGATGTGGATTGCGAAAACCTGGGAAGAAGACACTCCATTTAAAGATCCGCGCG  
 AGCTGTATGATTTTTTAAAGACGGAAGCCGAAGAGGAACCTGTCTTTTCCCACGGCGACCTGGGAGACAGCAACATC  
 TTTGTGAAAGATGGCAAAGTAAGTGGCTTTATTGATCTTGGGAGAAGCGGCAGGGCGGACAAGTGGTATGACATTGCCTT  
 CTGCGTCCGGTCGATCAGGGAGGATATCGGGGAAGAACAGTATGTCGAGCTATTTTTTTGACTTACTGGGGATCAAGCCTG  
 ATTGGGAGAAAATAAAATATTATATTTTACTGGATGAATTGTTTTAGTACCTAGATTTAGATATCTAAA GCATGC  
*SphI*

### pACYC\_P1''\_ΔP2\_aphA3 (3,187 bp)

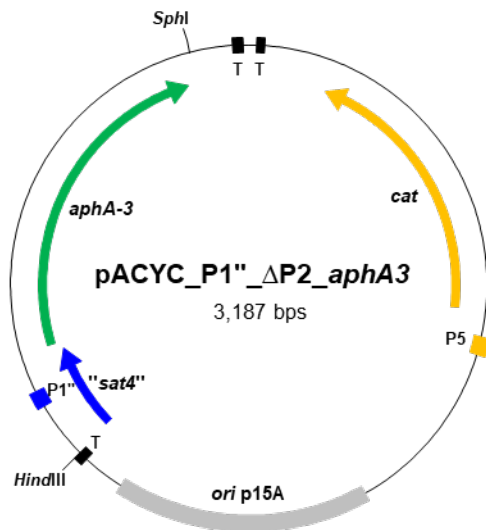

## pACYC\_P1" \_ΔP2\_aphA3 (an insert size 1,059 bp)

*Hind*III

**AAGCTT**ACCGAGGTATGAAAACGAGAATTGGACCTTTACAGAATTACTCTATGAAGCGCCATATTTAAAAAGCTACCAAG  
 ACGAAGAGGATGAAGAGGATGAGGAGGCAGATTGCCTTGAATATAT**TGACAATACTGATAAGATAATATATCTT**TACTAC  
 CAAGACGATAAAATGCGTCGGAAAAGTTAAACTGCGAAAAAATTGGAACCGGTACGCTTATACTGTAGAAAAGAGGAAGGA  
 AATAATAA**ATGGCT**AAAAATGAGAATATCACCGGAATTGAAAAAACTGATCGAAAAATACCGCTGCGTAAAAGATACGGAA  
 GGAATGTCTCCTGCTAAGGTATATAAGCTGGTGGGAGAAAATGAAAACCTATATTTAAAAATGACGGACAGCCGGTATAA  
 AGGGACCACCTATGATGTGGAACGGGAAAAGGACATGATGCTATGGCTGGAAGGAAAGCTGCCTGTTCCAAAGGTCCTGC  
 ACTTTGAACGGCATGATGGCTGGAGCAATCTGCTCATGAGTGAGGCCGATGGCGTCCTTTGCTCGGAAGAGTATGAAGAT  
 GAACAAAGCCCTGAAAAGATTATCGAGCTGTATGCGGAGTGCATCAGGCTCTTTCACCTCCATCGACATATCGGATTGTCC  
 CTATACGAATAGCTTAGACAGCCGCTTAGCCGAATTGGATTACTTACTGAATAACGATCTGGCCGATGTGGATTGCGAAA  
 ACTGGGAAGAAGACACTCCATTTAAAGATCCGCGCGAGCTGTATGATTTTTTAAAGACGGAAGCCCGAAGAGGAACTT  
 GTCTTTTCCACGGCGACCTGGGAGACAGCAACATCTTTGTGAAAGATGGCAAAGTAAGTGGCTTTATTGATCTTGGGAG  
 AAGCGGCAGGGCGGACAAGTGGTATGACATTGCCCTTCTGCGTCCGGTCGATCAGGGAGGATATCGGGGAAGAACAGTATG  
 TCGAGCTATTTTTTGACTTACTGGGGATCAAGCCTGATTGGGAGAAAATAAAATATTATATTTTACTGGATGAATTGTTT  
**TAG**TACCTAGATTTAGATATCTAAAG**GCATGC**

*Sph*I

### pACYC\_P2\_aphA3 (3,030 bp)

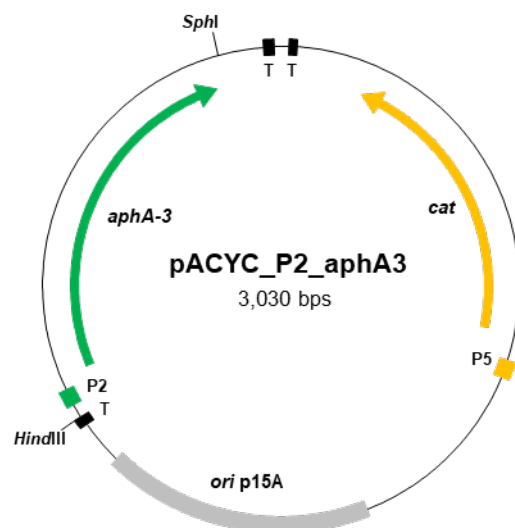

### pACYC\_P2\_aphA3 (an insert size 902 bp)

*HindIII*

**AAGCTT**CGAACAGTGAATTGGAGTTCGTC**TTGTTATAATTAGCTTCTTGGGGTATCTT**TAAATACTGTAGAAAAGAGGAA  
 GGAAATAATAA**ATGGCTAAAATGAGAATATCACCGGAATTGAAAAAACTGATCGAAAAATACCGCTGCGTAAAAGATACG**  
**GAAGGAATGTCTCCTGCTAAGGTATATAAGCTGGTGGGAGAAAATGAAAACCTATATTTAAAAATGACGGACAGCCGGTA**  
**TAAAGGGACCACCTATGATGTGGAACGGGAAAAGGACATGATGCTATGGCTGGAAGGAAAGCTGCCTGTTCCAAAGGTCC**  
**TGCACTTTGAACGGCATGATGGCTGGAGCAATCTGCTCATGAGTGAGGCCGATGGCGTCCTTTGCTCGGAAGAGTATGAA**  
**GATGAACAAAGCCCTGAAAAGATTATCGAGCTGTATGCGGAGTGATCAGGCTCTTTCCTCCATCGACATATCGGATTG**  
**TCCCTATACGAATAGCTTAGACAGCCGCTTAGCCGAATTGGATTACTTACTGAATAACGATCTGGCCGATGTGGATTGCG**  
**AAAAGTGGGAAGAAGACACTCCATTTAAAGATCCGCGGAGCTGTATGATTTTTTAAAGACGGAAAAGCCCGAAGAGGAA**

CTTGTCTTTTCCACGGCGACCTGGGAGACAGCAACATCTTTGTGAAAGATGGCAAAGTAAGTGGCTTTATTGATCTTGG  
 GAGAAGCGGCAGGGCGGACAAGTGGTATGACATTGCCTTCTGCGTCCGGTCGATCAGGGAGGATATCGGGGAAGAACAGT  
 ATGTCGAGCTATTTTTTACTTACTGGGGATCAAGCCTGATTGGGAGAAAATAAAATATTATATTTTACTGGATGAATTG  
 TTTTAGTACCTAGATTAGATATCTAAAGCATGC

*SphI*

### pACYC\_ΔP2\_aphA3-19 (2,971 bp)

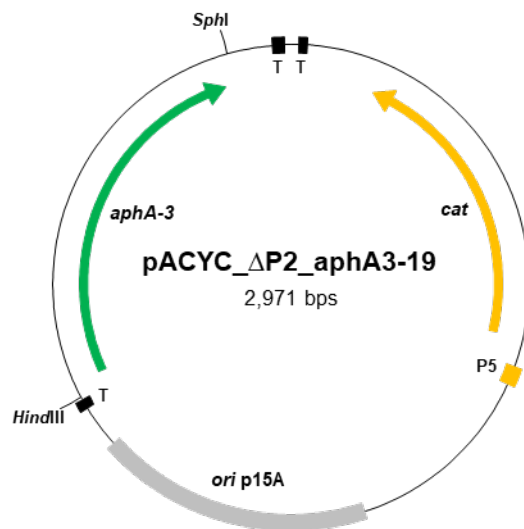

### pACYC\_ΔP2\_aphA3-19 (an insert size 843 bp)

*HindIII*

AAAGCTTTGTAGAAAAGAGGAAGGAAATAATAAATGGCTAAATGAGAATATCACCGGAATTGAAAAAACTGATCGAAAA  
 TACCGCTGCGTAAAAGATACGGAAGGAATGTCTCCTGCTAAGGTATATAAGCTGGTGGGAGAAAATGAAAACCTATATTT  
 AAAAATGACGGACAGCCGGTATAAAGGGACCACCTATGATGTGGAACGGGAAAAGGACATGATGCTATGGCTGGAAGGAA  
 AGCTGCCTGTTCCAAAGGTCCTGCACTTTGAACGGCATGATGGCTGGAGCAATCTGCTCATGAGTGAGGCCGATGGCGTC

CTTTGCTCGGAAGAGTATGAAGATGAACAAAGCCCTGAAAAGATTATCGAGCTGTATGCGGAGTGCATCAGGCTCTTTCA  
 CTCCATCGACATATCGGATTGTCCCTATACGAATAGCTTAGACAGCCGCTTAGCCGAATTGGATTACTTACTGAATAACG  
 ATCTGGCCGATGTGGATTGCGAAAACCTGGGAAGAAGACACTCCATTTAAAGATCCGCGGAGCTGTATGATTTTTTAAAG  
 ACGGAAAAGCCC GAAGAGGAAC TTGTCTTTTCCCACGGCGACCTGGGAGACAGCAACATCTTTGTGAAAGATGGCAAAGT  
 AAGTGGCTTTATTGATCTTGGGAGAAGCGGCAGGGCGGACAAGTGGTATGACATTGCCTTCTGCGTCCGGTCGATCAGGG  
 AGGATATCGGGGAAGAACAGTATGTCGAGCTATTTTTTTGACTTACTGGGGATCAAGCCTGATTGGGAGAAAATAAAATAT  
 TATATTTTACTGGATGAATTGTTTTAGTACCTAGATTTAGATATCTAAAGCATGC  
*SphI*

### pACYC\_ΔP2\_aphA3-17 (2,971 bp)

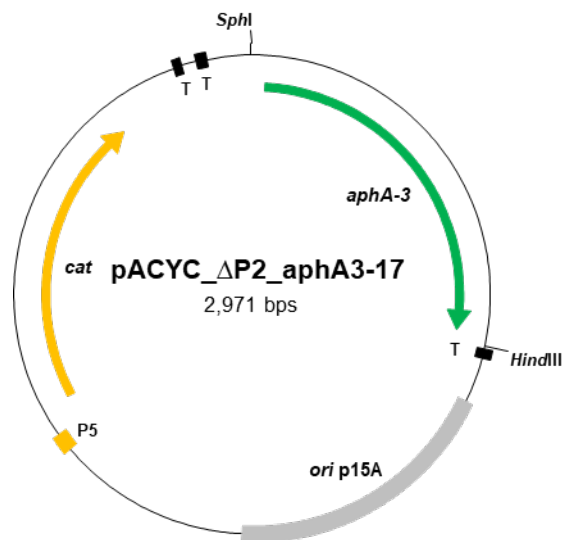

### pACYC\_ΔP2\_aphA3-17 (an insert size 843 bp)

*SphI*  
 GCATGCTGTAGAAAAGAGGAAGGAAATAATAAATGGCTAAAATGAGAATATCACCGGAATTGAAAAAACTGATCGAAAAA

TACCGCTGCGTAAAAGATACGGAAGGAATGTCTCCTGCTAAGGTATATAAGCTGGTGGGAGAAAATGAAAACCTATATTT  
 AAAAATGACGGACAGCCGGTATAAAGGGACCACCTATGATGTGGAACGGGAAAAGGACATGATGCTATGGCTGGAAGGAA  
 AGCTGCCTGTTCCAAAGGTCCTGCACCTTTGAACGGCATGATGGCTGGAGCAATCTGCTCATGAGTGAGGCCGATGGCGTC  
 CTTTGCTCGGAAGAGTATGAAGATGAACAAAGCCCTGAAAAGATTATCGAGCTGTATGCGGAGTGCATCAGGCTCTTTCA  
 CTCCATCGACATATCGGATTGTCCCTATACGAATAGCTTAGACAGCCGCTTAGCCGAATTGGATTACTTACTGAATAACG  
 ATCTGGCCGATGTGGATTGCGAAAACCTGGGAAGAAGACACTCCATTTAAAGATCCGCGCGAGCTGTATGATTTTTTTAAAG  
 ACGGAAAAGCCCCGAAGAGGAACTTGTCTTTTCCCACGGCGACCTGGGAGACAGCAACATCTTTGTGAAAGATGGCAAAGT  
 AAGTGGCTTTATTGATCTTGGGAGAAGCGGCAGGGCGGACAAGTGGTATGACATTGCCTTCTGCGTCCGGTCGATCAGGG  
 AGGATATCGGGGAAGAACAGTATGTCGAGCTATTTTTTTGACTTACTGGGGATCAAGCCTGATTGGGAGAAAATAAAATAT  
 TATATTTTACTGGATGAATTGTTTTAGTACCTAGATTTAGATATCTAAA**AAGCTT**

*HindIII*

## References:

1. Caillaud, F.; Trieu-Cuot, P.; Carlier, C.; Courvalin, P. Nucleotide sequence of the kanamycin resistance determinant of the pneumococcal transposon Tn1545: evolutionary relationships and transcriptional analysis of *aphA-3* genes. *Mol Gen Genet.* **1987**, *207*, 509-513.
2. Trieu-Cuot, P.; Gerbaud, G.; Lambert, T.; Courvalin, P. *In vivo* transfer of genetic information between gram-positive and gram-negative bacteria. *EMBO J* **1985**, *4*, 3583-3587.
3. Trieu-Cuot, P.; Klier, A.; Courvalin, P. DNA sequences specifying the transcription of the streptococcal kanamycin resistance gene in *Escherichia coli* and *Bacillus subtilis*. *Mol Gen Genet.* **1985**, *198*, 348-352.



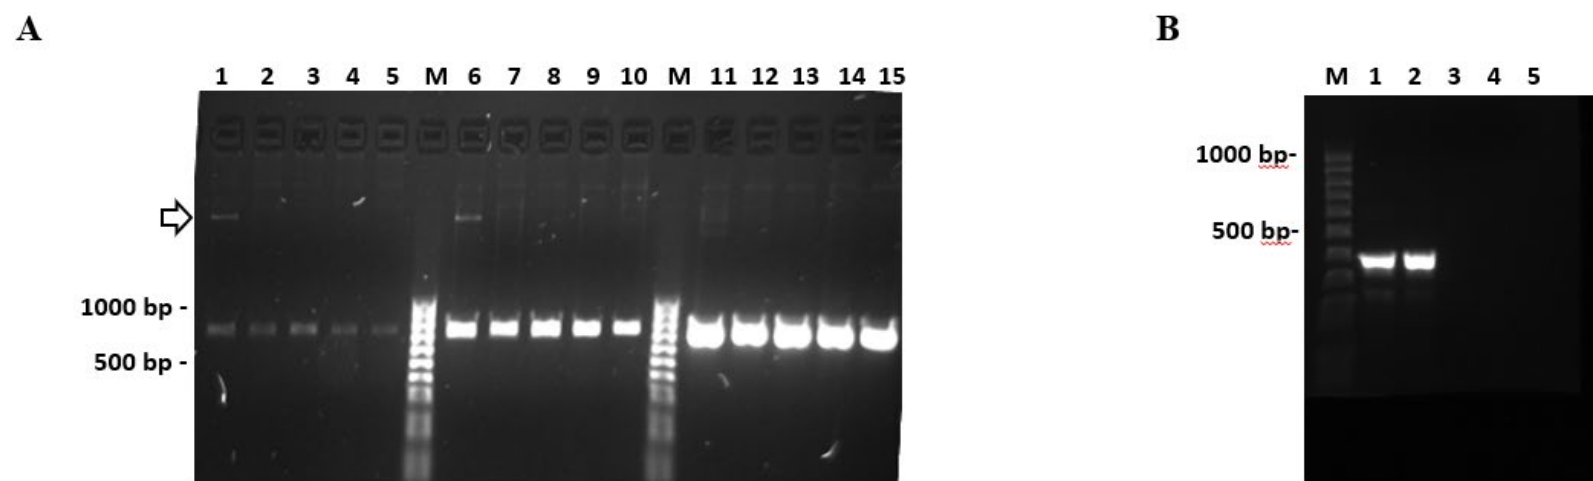

**Figure S6:** analyses of a potential loss of the *aadE*\*-*sat4*-*aphA*-3 gene cluster as well as prophage during multiple passages of *M. bovirhinis* HAZ141\_2 under nonselective conditions. **(A).** Semi-quantitative PCR was performed to detect a potential increase in amount of the PCR product (727 bp in length) available upon excision of the *aadE*\*-*sat4*-*aphA*-3 gene cluster during nonselective serial passages (in Kn-free broth). Genomic DNA (50 ng) of *M. bovirhinis* HAZ141\_2 parent strain (p.3) as well as DNAs of clonal passages were subjected to PCR amplification with 0922\_down\_F1 and up-aadE\_F2 primers (Table S1) using different number of amplification cycles. *M. bovirhinis* HAZ141\_2 p.3 (lanes 1, 6, and 11), p.30 (lanes 2, 7 and 12) and p.50 (lanes 3, 8 and 13), p. 80 (lanes 4, 9 and 14) and p.100 (lanes 5, 10 and 15). The numbers of PCR cycles were as the following: 22 – lanes 1-5; 26 – lanes 6-10; and 30 – lanes 11-15. A weaker band near 6.6 kb appeared in lanes 1 and 6 represents an intact genomic *aadE*\*-*sat4*-*aphA*-3 containing region present in the wild type configuration. **(B).** Potential excision of *M. bovirhinis* HAZ141\_2 prophage was tested using pseudo\_R and tRNA-Leu\_F primers (Table S1). The PCR allows identification of the predicted restored junction upon excision of the prophage as well as a "prophage-empty place" in prophagesless *M. bovirhinis* strains. *M. bovirhinis* type strain PG43 (lane 1), Israeli *M. bovirhinis* strain 316981 (lane 2) and *M. bovirhinis* HAZ141\_2 p.3, p.50 and p.100 clones (lanes 3-5, respectively). PCR product of 378 bp was obtained only in prophagesless strains (lanes 1-2). The 100-bp ladder (BioRad, California, USA) is shown as M.
